# Supplementary material
Source: PubMed Central journal article supplement (PMC8304170)
Supplement: jamaotolaryngolheadnecksurg-e211728-s001.pdf [file jamaotolaryngolheadnecksurg-e211728-s001.pdf]

## Supplementary Online Content

Osazuwa-Peters N, Barnes JM, Okafor SI, et al. Incidence and risk of suicide among patients with head and neck cancer in rural, urban, and metropolitan areas. *JAMA Otolaryngol Head Neck Surg*. Published online July 23, 2021. doi:10.1001/jamaoto.2021.1728

**eTable 1.** Characteristics of Missing Data

**eTable 2.** Sensitivity Analyses

This supplementary material has been provided by the authors to give readers additional information about their work.

**eTable 1.** Characteristics of Missing Data

|                        |                    | Nonmissing    | Missing      |
|------------------------|--------------------|---------------|--------------|
| Age                    | 18-39              | 6871 (5.1)    | 703 (5.3)    |
|                        | 40-64              | 89917 (66.8)  | 8679 (65.3)  |
|                        | 65-74              | 37722 (28)    | 3918 (29.5)  |
| Race/ethnicity         | Non-Hispanic White | 98444 (73.2)  | 8807 (73.2)  |
|                        | Non-Hispanic Other | 9256 (6.9)    | 963 (8)      |
|                        | Non-Hispanic Black | 15952 (11.9)  | 1234 (10.3)  |
|                        | Hispanic           | 10858 (8.1)   | 1025 (8.5)   |
| Sex                    | Male               | 101142 (75.2) | 9676 (72.8)  |
|                        | Female             | 33368 (24.8)  | 3624 (27.2)  |
| County-level Income    | High               | 30426 (22.6)  | 3290 (24.8)  |
|                        | Mid-high           | 33868 (25.2)  | 3374 (25.4)  |
|                        | Mid-low            | 31612 (23.5)  | 2956 (22.3)  |
|                        | Low                | 38604 (28.7)  | 3663 (27.6)  |
| County-level Education | High               | 31400 (23.3)  | 3663 (27.6)  |
|                        | Mid-high           | 31231 (23.2)  | 2999 (22.6)  |
|                        | Mid-low            | 37531 (27.9)  | 3501 (26.4)  |
|                        | Low                | 34348 (25.5)  | 3120 (23.5)  |
| Residence              | Metropolitan       | 116532 (86.6) | 11147 (85.3) |
|                        | Urban              | 15710 (11.7)  | 1676 (12.8)  |
|                        | Rural              | 2268 (1.7)    | 247 (1.9)    |
| Cancer Site            | Non-oro-pharynx    | 130707 (97.2) | 12930 (97.2) |
|                        | oro-pharynx        | 3803 (2.8)    | 370 (2.8)    |
| Stage at diagnosis     | Distant            | 12953 (9.6)   | 796 (6)      |
|                        | Localized          | 36119 (26.9)  | 4052 (30.5)  |
|                        | Regional           | 28159 (20.9)  | 1726 (13)    |
|                        | Unknown/Unstaged   | 57279 (42.6)  | 6726 (50.6)  |
| Marital Status         | Unmarried          | 57763 (42.9)  | 1491 (48.5)  |
|                        | Married            | 76747 (57.1)  | 1581 (51.5)  |
| Suicide                | No suicide         | 134105 (99.7) | 13262 (99.7) |
|                        | Death by suicide   | 405 (0.3)     | 38 (0.3)     |

**eTable 2.** Sensitivity Analyses

|                               |                    | County covariates, No insurance |         | No county covariates, insurance |         | County covariates, insurance |         |
|-------------------------------|--------------------|---------------------------------|---------|---------------------------------|---------|------------------------------|---------|
|                               |                    | HR (95% CI)                     | P-value | HR (95% CI)                     | P-value | Estimate (95% CI)            | P-value |
| Residence                     | Metropolitan       | 0.617 (0.348, 1.092)            | 0.097   | 0.547 (0.256, 1.17)             | 0.12    | 0.56 (0.247, 1.271)          | 0.165   |
|                               | Urban              | 0.547 (0.3, 0.997)              | 0.049   | 0.522 (0.225, 1.213)            | 0.131   | 0.57 (0.243, 1.334)          | 0.195   |
|                               | Rural              | Reference                       |         | Reference                       |         | Reference                    |         |
| Age                           | 18-39              | Strata                          |         | Strata                          | Strata  | Strata                       | Strata  |
|                               | 40-64              | Strata                          |         | Strata                          | Strata  | Strata                       | Strata  |
|                               | 65-74              | Strata                          |         | Strata                          | Strata  | Strata                       | Strata  |
| Race/<br>ethnicity            | Non-Hispanic White | Reference                       |         | Reference                       |         | Reference                    |         |
|                               | Non-Hispanic Other | 0.549 (0.324, 0.93)             | 0.026   | 0.381 (0.155, 0.933)            | 0.035   | 0.359 (0.146, 0.886)         | 0.026   |
|                               | Non-Hispanic Black | 0.19 (0.107, 0.34)              | 0       | 0.185 (0.076, 0.454)            | 0       | 0.19 (0.077, 0.465)          | 0       |
|                               | Hispanic           | 0.346 (0.198, 0.606)            | 0       | 0.338 (0.149, 0.767)            | 0.009   | 0.307 (0.134, 0.699)         | 0.005   |
| Sex                           | Male               | Reference                       |         | Reference                       |         | Reference                    |         |
|                               | Female             | 0.225 (0.153, 0.331)            | 0       | 0.227 (0.129, 0.399)            | 0       | 0.227 (0.129, 0.4)           | 0       |
| Marital                       | Unmarried          | Strata                          |         | Strata                          | Strata  | Strata                       |         |
|                               | Married            | Strata                          |         | Strata                          | Strata  | Strata                       | Strata  |
| County-<br>level<br>Income    | High               | Reference                       |         | NA                              | Strata  | Reference                    |         |
|                               | Mid-high           | 1.195 (0.889, 1.606)            | 0.238   | NA                              | NA      | 0.917 (0.601, 1.401)         | 0.69    |
|                               | Mid-low            | 1.128 (0.806, 1.578)            | 0.484   | NA                              | NA      | 0.804 (0.495, 1.307)         | 0.379   |
|                               | Low                | 1.204 (0.851, 1.704)            | 0.294   | NA                              | NA      | 0.742 (0.444, 1.241)         | 0.256   |
| County-<br>level<br>Education | High               | Reference                       |         | NA                              | NA      | Reference                    |         |
|                               | Mid-high           | 1.016 (0.757, 1.364)            | 0.914   | NA                              | NA      | 0.995 (0.638, 1.552)         | 0.984   |
|                               | Mid-low            | 0.973 (0.719, 1.315)            | 0.856   | NA                              | NA      | 1.13 (0.728, 1.754)          | 0.587   |
|                               | Low                | 1.137 (0.826, 1.564)            | 0.431   | NA                              | NA      | 1.571 (0.986, 2.504)         | 0.058   |
| Stage at<br>Diagnosis         | Distant            | Strata                          |         | Strata                          | Strata  | Strata                       | Strata  |
|                               | Localized          | Strata                          |         | Strata                          | Strata  | Strata                       | Strata  |

|             |                   |                      |       |                      |        |                      |        |
|-------------|-------------------|----------------------|-------|----------------------|--------|----------------------|--------|
|             | Regional          | Strata               |       | Strata               | Strata | Strata               | Strata |
|             | Unknown/unstaged  | Strata               |       | Strata               | Strata | Strata               | Strata |
| Cancer Site | Non-oro-pharynx   | Reference            |       | Reference            |        | Reference            |        |
|             | oro-pharynx       | 1.627 (0.996, 2.658) | 0.052 | 1.408 (0.676, 2.933) | 0.361  | 1.412 (0.677, 2.941) | 0.357  |
| Insurance   | Private insurance | NA                   | NA    | Reference            |        | Reference            |        |
|             | Medicaid          | NA                   | NA    | 0.863 (0.547, 1.359) | 0.524  | 0.85 (0.539, 1.341)  | 0.486  |
|             | Uninsured         | NA                   | NA    | 1.881 (1.126, 3.144) | 0.016  | 1.904 (1.136, 3.189) | 0.014  |
